# Supplementary material for: Calculation of the infrared spectra of organophosphorus compounds and prediction of new types of nerve agents
Source: Royal Society of Chemistry journal article supplement (doi:10.1039/d2nj00850e), 2022-01-01
Supplement: d2nj00850e1.pdf [file d2nj00850e1.pdf]

Supporting Information for

## **Calculation of infrared spectra of organophosphorus compounds and prediction of new types of nerve agents**

*Honghyun Kim<sup>a</sup>, Ung Hwi Yoon<sup>b</sup>, Tae In Ryu<sup>c</sup>, Hey Jin Jeong<sup>b</sup>, Sung il Kim<sup>b</sup>, Jinseon Park<sup>b</sup>, Young Sik Kye<sup>b</sup>, Seung-Ryul Hwang<sup>c</sup>, Dongwook Kim<sup>b</sup>, Yoonjae cho<sup>c</sup>, and Keunhong Jeong<sup>b\*</sup>*

<sup>a</sup>Department of Civil Engineering and Environmental Sciences, Korea Military Academy, Seoul, 01805, South Korea.

<sup>b</sup>Department of Physics and Chemistry, Korea Military Academy, Seoul, 01805, South Korea.

<sup>c</sup>Accident Coordination and Training Division, National Institute of Chemical Safety (NICS), 270 Osongsaengmyeong 11-ro, Heungdeok-gu, Cheongju, Chungcheongbukdo, 28164, Sout Korea

Corresponding authors: K. Jeong (doas1mind@berkeley.edu / doas1mind@kma.ac.kr)

**Table S1.** Assignment to major peaks for each OP compound

| Peak<br>Assignment                  | Wavenumber (cm <sup>-1</sup> ) |        |                |        |               |      |
|-------------------------------------|--------------------------------|--------|----------------|--------|---------------|------|
|                                     | Experiment                     | M06-2X | M06-2X(Scaled) | B3LYP  | B3LYP(Scaled) |      |
| Methyldiphenylphosphine<br>Oxide    | P=O str                        | 1169   | 1232           | 1178.9 | 1196          | 1215 |
|                                     | P-C str                        | 1303   | 1330           | 1272.7 | 1332          | 1305 |
|                                     | C=C str<br>(aroma)             | 1439   | 1477           | 1413.3 | 1468          | 1443 |
|                                     | C-H str                        | 2909   | 3171           | 3034.3 | 3044          | 2940 |
|                                     | C-H str                        | 2978   | 3199           | 3061.1 | 3132          | 3071 |
|                                     | C-H str<br>(aroma)             | 3052   | 3227           | 3087.9 | 3188          | 3083 |
| Triphenylphosphine<br>Oxide         | C-H<br>bending                 | 1108   | 1140           | 1090.9 | 1100          | 1106 |
|                                     | P=O str                        | 1271   | 1316           | 1259.3 | 1295          | 1274 |
|                                     | P=O str                        | 1439   | 1484           | 1420   | 1441          | 1470 |
|                                     | C=C str                        | 1587   | 1660           | 1588.5 | 1583          | 1624 |
|                                     | C-H str                        | 3063   | 3228           | 3088.9 | 3072          | 3199 |
| tris(bromomethyl)phosphine<br>Oxide | P=O str                        | 1119   | 1148           | 1098.5 | 1120          | 1111 |
|                                     | P=O str                        | 1182   | 1228           | 1175.1 | 1190          | 1213 |
|                                     | C=C str<br>(aroma)             | 1311   | 1356           | 1297.6 | 1351          | 1332 |
|                                     | C=C str<br>(aroma)             | 1438   | 1476           | 1412.4 | 1463          | 1441 |
|                                     | C-H str<br>(aroma)             | 3056   | 3228           | 3088.9 | 3192          | 3082 |
| Triethylphosphine<br>Oxide          | P=O str                        | 1209   | 1281           | 1225.8 | 1246          | 1260 |
|                                     | C-H<br>bending                 | 1378   | 1428           | 1366.5 | 1428          | 1396 |
|                                     | C-H str                        | 2936   | 3122           | 2987.4 | 3101          | 2994 |
|                                     | C-H str                        | 3002   | 3192           | 3054.4 | 3171          | 3060 |
| Phenylphosphonic<br>dichloride      | P=O str                        | 1156   | 1211           | 1158.8 | 1183          | 1201 |
|                                     | C-H<br>bending                 | 1248   | 1281           | 1225.8 | 1274          | 1258 |
|                                     | C-H<br>bending                 | 1270   | 1295           | 1239.2 | 1295          | 1277 |
|                                     | C-H<br>bending                 | 1378   | 1414           | 1353.1 | 1414          | 1386 |

---

|             |      |      |        |      |      |
|-------------|------|------|--------|------|------|
| C-H bending | 1412 | 1456 | 1393.1 | 1456 | 1426 |
| C-H bending | 1457 | 1512 | 1393.2 | 1505 | 1470 |
| C-H str     | 2880 | 3059 | 1446.8 | 3031 | 2929 |

---

**Table S2.** Assignment to major peaks for each nerve agent

| Peak<br>Assignment | Wavenumber (cm <sup>-1</sup> ) |        |                |        |               |      |
|--------------------|--------------------------------|--------|----------------|--------|---------------|------|
|                    | Experiment                     | M06-2X | M06-2X(Scaled) | B3LYP  | B3LYP(Scaled) |      |
| GA(Tabun)          | P-O-C str                      | 1008.2 | 1008           | 964.6  | 973           | 1023 |
|                    | P=O str                        | 1266   | 1309           | 1252.6 | 1267          | 1270 |
|                    | CH <sub>3</sub> def            | 1458.9 | 1505           | 1440.1 | 1498          | 1464 |
|                    | CH <sub>3</sub> def            | 1490.1 | 1526           | 1460.2 | 1526          | 1486 |
|                    | C≡N str                        | 2201.2 | 2380           | 2277.4 | 2310          | 2234 |
|                    | C-H str                        | 2911.4 | 3045           | 2913.8 | 3010          | 2888 |
| GB(Sarin)          | P-O-C str                      | 1034   | 1064           | 1018.1 | 1008          | 1005 |
|                    | P=O str                        | 1277   | 1337           | 1279.4 | 1309          | 1313 |
|                    | P-CH <sub>3</sub><br>sym def   | 1322   | 1365           | 1306.2 | 1351          | 1339 |
|                    | CH <sub>3</sub> def            | 1475   | 1512           | 1446.8 | 1512          | 1471 |
|                    | C-H str                        | 2928   | 3059           | 2927.2 | 3031          | 2911 |
|                    | C-H str                        | 2965   | 3157           | 3020.9 | 3108          | 2983 |
| GD(Soman)          | P-O-C str                      | 1017   | 1057           | 1011.4 | 1022          | 1005 |
|                    | P=O str                        | 1276   | 1344           | 1286.1 | 1309          | 1312 |
|                    | P-CH <sub>3</sub><br>sym       | 1321   | 1372           | 1312.9 | 1351          | 1336 |
|                    | CH <sub>3</sub> def            | 1484   | 1533           | 1466.9 | 1526          | 1487 |
|                    | C-H str                        | 2927   | 3052           | 2920.5 | 3024          | 2902 |
|                    | C-H str                        | 2964   | 3143           | 3007.5 | 3087          | 2961 |
| GF<br>(Cyclosarin) | P-O-C str                      | 1017   | 1106           | 1058.3 | 1022          | 1006 |
|                    | P=O str                        | 1278   | 1337           | 1279.4 | 1309          | 1312 |
|                    | P-CH <sub>3</sub><br>sym       | 1321   | 1372           | 1312.9 | 1351          | 1339 |
|                    | CH <sub>2</sub><br>Bending     | 1452   | 1498           | 1433.4 | 1498          | 1460 |
|                    | C-H str                        | 2861   | 3052           | 2920.5 | 3010          | 2892 |
|                    | C-H str                        | 2939   | 3108           | 2974   | 3031          | 2935 |
|                    | C-H str                        | 2996   | 3178           | 3041   | 3059          | 3010 |
| VX                 | P-O-C str                      | 1035   | 1116           | 1067.9 | 1060          | 1026 |
|                    | P=O str                        | 1233   | 1292           | 1236.3 | 1236          | 1262 |
|                    | P-CH <sub>3</sub><br>sym       | 1300   | 1340           | 1282.2 | 1252          | 1308 |
|                    | P-CH <sub>3</sub><br>asym      | 1383   | 1436           | 1374.1 | 1428          | 1392 |

---

|                            |      |      |        |      |      |
|----------------------------|------|------|--------|------|------|
| CH <sub>2</sub><br>bending | 1477 | 1516 | 1450.7 | 1516 | 1475 |
| C-H str                    | 2873 | 3060 | 2928.1 | 3020 | 2897 |
| C-H str                    | 2967 | 3132 | 2997   | 3092 | 2964 |

---

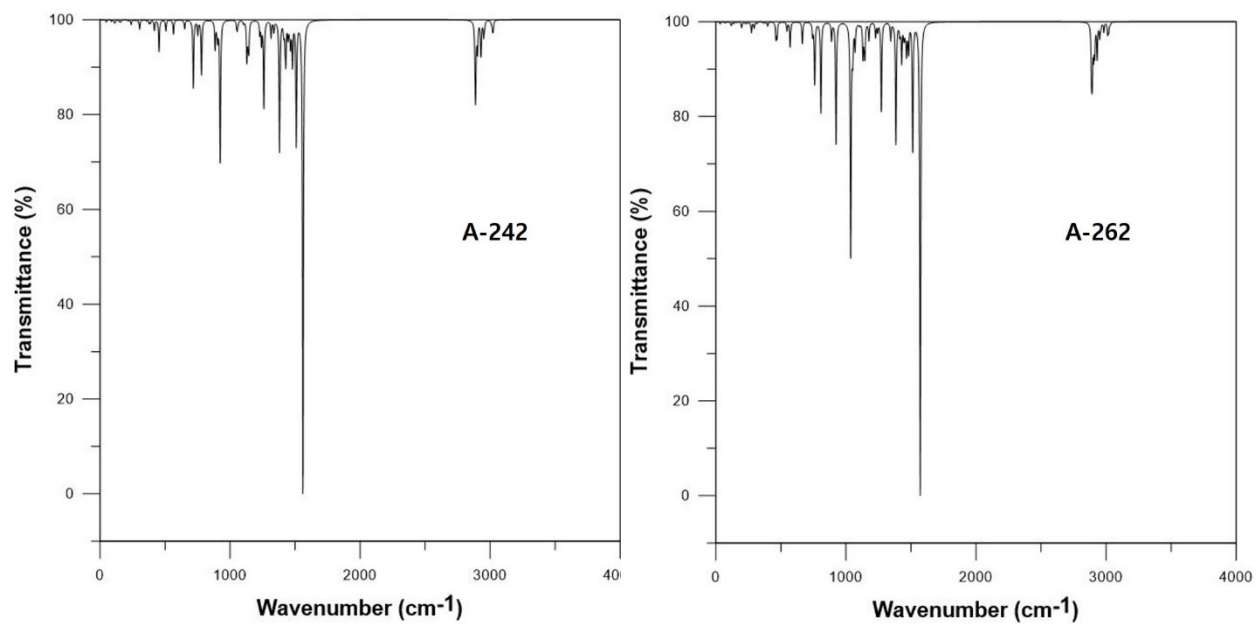

**Figure S1.** IR-spectra derived from DFT calculation for A-242 and A-262

**Table S3.** Novichok candidates obtained through alkyl group substitution

| Structure Name | IR Spectra                                                                           |
|----------------|--------------------------------------------------------------------------------------|
| 1111           | 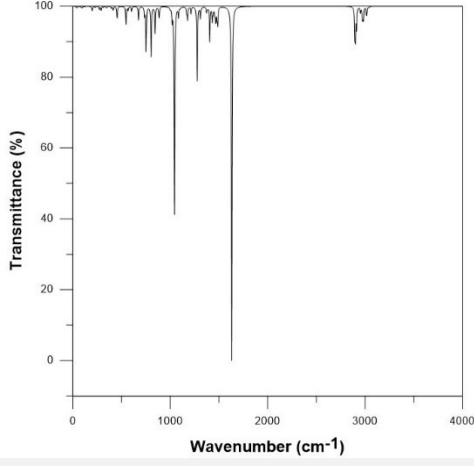   |
| 1112           |   |
| 1113           |  |

| Structure Name | IR Spectra                                                                                                                                                                                                                                                                                                                                                                                                                                                                                                                                                                            |
|----------------|---------------------------------------------------------------------------------------------------------------------------------------------------------------------------------------------------------------------------------------------------------------------------------------------------------------------------------------------------------------------------------------------------------------------------------------------------------------------------------------------------------------------------------------------------------------------------------------|
| 1121           | 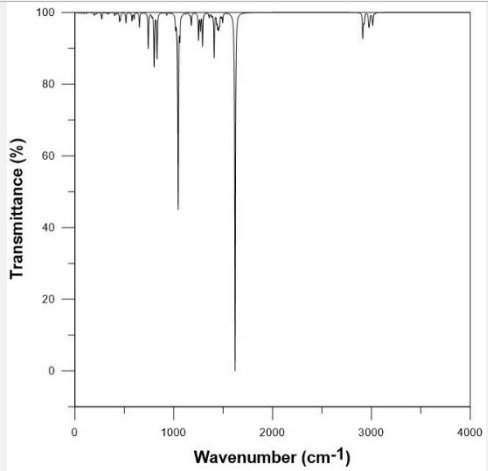 <p>The IR spectrum for structure 1121 shows transmittance (%) on the y-axis (0 to 100) and wavenumber (cm<sup>-1</sup>) on the x-axis (0 to 4000). Key features include a sharp peak at approximately 1715 cm<sup>-1</sup> (C=O stretch), a strong peak at approximately 1640 cm<sup>-1</sup> (C=C stretch), and a very strong, sharp peak at approximately 1600 cm<sup>-1</sup> (C=C stretch). There are also several peaks in the fingerprint region between 1500 and 600 cm<sup>-1</sup>.</p>   |
| 1122           |  <p>The IR spectrum for structure 1122 shows transmittance (%) on the y-axis (0 to 100) and wavenumber (cm<sup>-1</sup>) on the x-axis (0 to 4000). Key features include a sharp peak at approximately 1715 cm<sup>-1</sup> (C=O stretch), a strong peak at approximately 1640 cm<sup>-1</sup> (C=C stretch), and a very strong, sharp peak at approximately 1600 cm<sup>-1</sup> (C=C stretch). There are also several peaks in the fingerprint region between 1500 and 600 cm<sup>-1</sup>.</p>  |
| 1123           |  <p>The IR spectrum for structure 1123 shows transmittance (%) on the y-axis (0 to 100) and wavenumber (cm<sup>-1</sup>) on the x-axis (0 to 4000). Key features include a sharp peak at approximately 1715 cm<sup>-1</sup> (C=O stretch), a strong peak at approximately 1640 cm<sup>-1</sup> (C=C stretch), and a very strong, sharp peak at approximately 1600 cm<sup>-1</sup> (C=C stretch). There are also several peaks in the fingerprint region between 1500 and 600 cm<sup>-1</sup>.</p> |



| Structure Name | IR Spectra                                                                                                                                                                                                                                                                                                                                                                                                                                                                                                                                                     |
|----------------|----------------------------------------------------------------------------------------------------------------------------------------------------------------------------------------------------------------------------------------------------------------------------------------------------------------------------------------------------------------------------------------------------------------------------------------------------------------------------------------------------------------------------------------------------------------|
| 1131           | 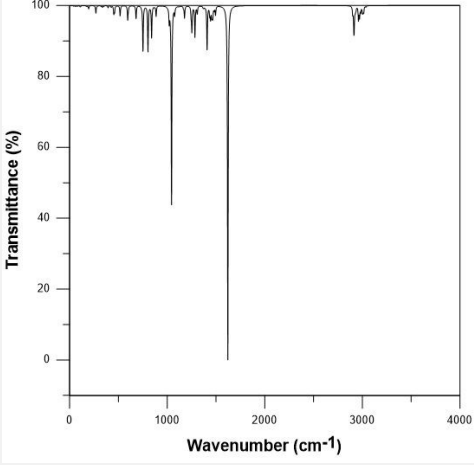 <p>The IR spectrum for structure 1131 shows transmittance (%) on the y-axis (0 to 100) and wavenumber (cm<sup>-1</sup>) on the x-axis (0 to 4000). Key features include a sharp peak at approximately 1715 cm<sup>-1</sup> (C=O stretch), a strong peak at approximately 1600 cm<sup>-1</sup> (C=C stretch), and several peaks in the fingerprint region between 1500 and 600 cm<sup>-1</sup>. There are no significant peaks in the 3000-3600 cm<sup>-1</sup> range.</p>   |
| 1132           |  <p>The IR spectrum for structure 1132 shows transmittance (%) on the y-axis (0 to 100) and wavenumber (cm<sup>-1</sup>) on the x-axis (0 to 4000). Key features include a sharp peak at approximately 1715 cm<sup>-1</sup> (C=O stretch), a strong peak at approximately 1600 cm<sup>-1</sup> (C=C stretch), and several peaks in the fingerprint region between 1500 and 600 cm<sup>-1</sup>. There are no significant peaks in the 3000-3600 cm<sup>-1</sup> range.</p>  |
| 1133           |  <p>The IR spectrum for structure 1133 shows transmittance (%) on the y-axis (0 to 100) and wavenumber (cm<sup>-1</sup>) on the x-axis (0 to 4000). Key features include a sharp peak at approximately 1715 cm<sup>-1</sup> (C=O stretch), a strong peak at approximately 1600 cm<sup>-1</sup> (C=C stretch), and several peaks in the fingerprint region between 1500 and 600 cm<sup>-1</sup>. There are no significant peaks in the 3000-3600 cm<sup>-1</sup> range.</p> |

| Structure Name | IR Spectra                                                                           |
|----------------|--------------------------------------------------------------------------------------|
| <b>1211</b>    | 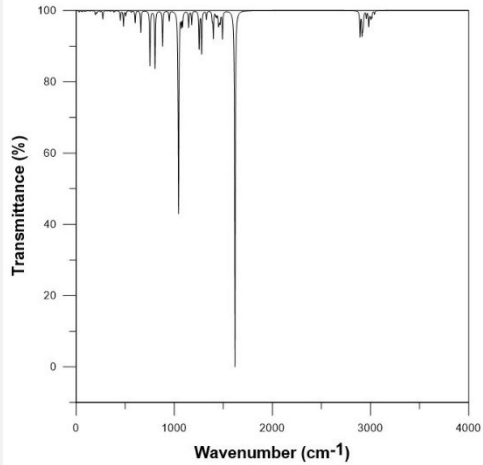   |
| <b>1212</b>    |   |
| <b>1213</b>    |  |

| Structure Name | IR Spectra                                                                                                                                                                                                                                                                                                                                                                                                                                                                                                                                                                                   |
|----------------|----------------------------------------------------------------------------------------------------------------------------------------------------------------------------------------------------------------------------------------------------------------------------------------------------------------------------------------------------------------------------------------------------------------------------------------------------------------------------------------------------------------------------------------------------------------------------------------------|
| 1221           | 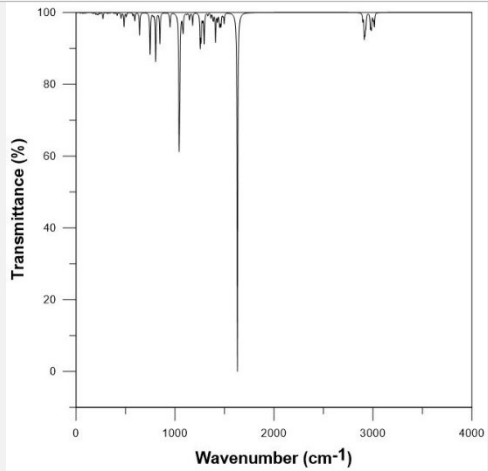 <p>The IR spectrum for structure 1221 shows a transmittance plot from 0 to 4000 cm<sup>-1</sup>. The y-axis is labeled 'Transmittance (%)' and ranges from 0 to 100. The x-axis is labeled 'Wavenumber (cm<sup>-1</sup>)' and ranges from 0 to 4000. The spectrum features a very sharp and intense absorption peak at approximately 1715 cm<sup>-1</sup>, characteristic of a carbonyl group. There are also several smaller peaks in the fingerprint region between 1500 and 600 cm<sup>-1</sup>.</p>   |
| 1222           |  <p>The IR spectrum for structure 1222 shows a transmittance plot from 0 to 4000 cm<sup>-1</sup>. The y-axis is labeled 'Transmittance (%)' and ranges from 0 to 100. The x-axis is labeled 'Wavenumber (cm<sup>-1</sup>)' and ranges from 0 to 4000. The spectrum features a very sharp and intense absorption peak at approximately 1715 cm<sup>-1</sup>, characteristic of a carbonyl group. There are also several smaller peaks in the fingerprint region between 1500 and 600 cm<sup>-1</sup>.</p>  |
| 1223           |  <p>The IR spectrum for structure 1223 shows a transmittance plot from 0 to 4000 cm<sup>-1</sup>. The y-axis is labeled 'Transmittance (%)' and ranges from 0 to 100. The x-axis is labeled 'Wavenumber (cm<sup>-1</sup>)' and ranges from 0 to 4000. The spectrum features a very sharp and intense absorption peak at approximately 1715 cm<sup>-1</sup>, characteristic of a carbonyl group. There are also several smaller peaks in the fingerprint region between 1500 and 600 cm<sup>-1</sup>.</p> |

| Structure Name | IR Spectra                                                                           |
|----------------|--------------------------------------------------------------------------------------|
| 1231           | 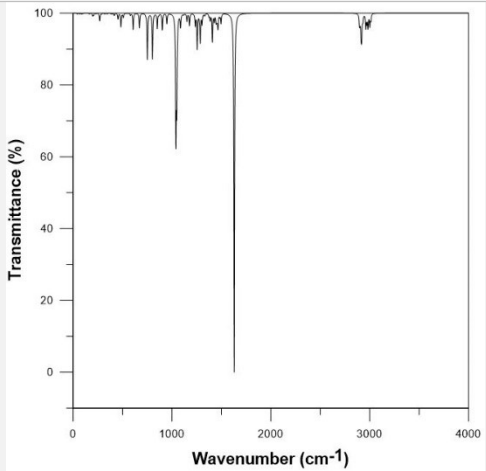   |
| 1232           |   |
| 1233           |  |

| Structure Name                                 | IR Spectra                                                                                                                                                                                                                                                                                                                                                                                                                                                                                                                                                                                             |
|------------------------------------------------|--------------------------------------------------------------------------------------------------------------------------------------------------------------------------------------------------------------------------------------------------------------------------------------------------------------------------------------------------------------------------------------------------------------------------------------------------------------------------------------------------------------------------------------------------------------------------------------------------------|
| <p style="text-align: center;"><b>1311</b></p> | 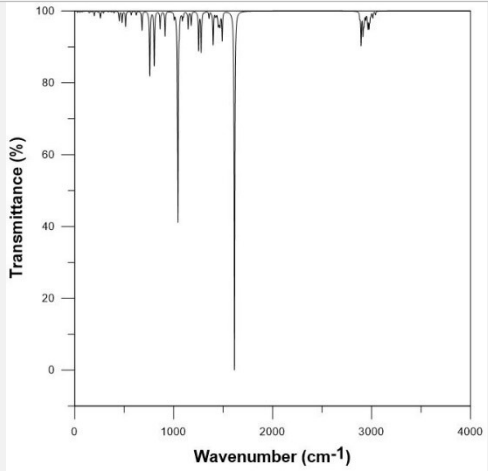 <p>The IR spectrum for structure 1311 shows transmittance (%) on the y-axis (0 to 100) and wavenumber (cm<sup>-1</sup>) on the x-axis (0 to 4000). Key absorption bands include a sharp peak at approximately 1715 cm<sup>-1</sup> (C=O stretch), a strong peak at approximately 1640 cm<sup>-1</sup> (C=C stretch), and a very strong, sharp peak at approximately 1600 cm<sup>-1</sup> (aromatic C=C stretch). There are also several peaks in the fingerprint region between 1500 and 600 cm<sup>-1</sup>.</p>   |
| <p style="text-align: center;"><b>1312</b></p> |  <p>The IR spectrum for structure 1312 shows transmittance (%) on the y-axis (0 to 100) and wavenumber (cm<sup>-1</sup>) on the x-axis (0 to 4000). Key absorption bands include a sharp peak at approximately 1715 cm<sup>-1</sup> (C=O stretch), a strong peak at approximately 1640 cm<sup>-1</sup> (C=C stretch), and a very strong, sharp peak at approximately 1600 cm<sup>-1</sup> (aromatic C=C stretch). There are also several peaks in the fingerprint region between 1500 and 600 cm<sup>-1</sup>.</p>  |
| <p style="text-align: center;"><b>1313</b></p> |  <p>The IR spectrum for structure 1313 shows transmittance (%) on the y-axis (0 to 100) and wavenumber (cm<sup>-1</sup>) on the x-axis (0 to 4000). Key absorption bands include a sharp peak at approximately 1715 cm<sup>-1</sup> (C=O stretch), a strong peak at approximately 1640 cm<sup>-1</sup> (C=C stretch), and a very strong, sharp peak at approximately 1600 cm<sup>-1</sup> (aromatic C=C stretch). There are also several peaks in the fingerprint region between 1500 and 600 cm<sup>-1</sup>.</p> |

| Structure Name | IR Spectra                                                                           |
|----------------|--------------------------------------------------------------------------------------|
| 1321           | 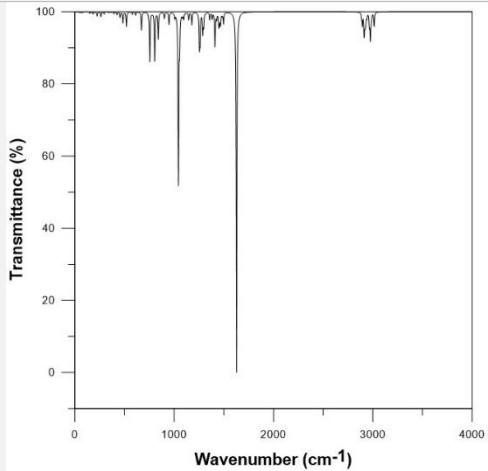   |
| 1322           |   |
| 1323           |  |

| Structure Name | IR Spectra                                                                           |
|----------------|--------------------------------------------------------------------------------------|
| <b>1331</b>    | 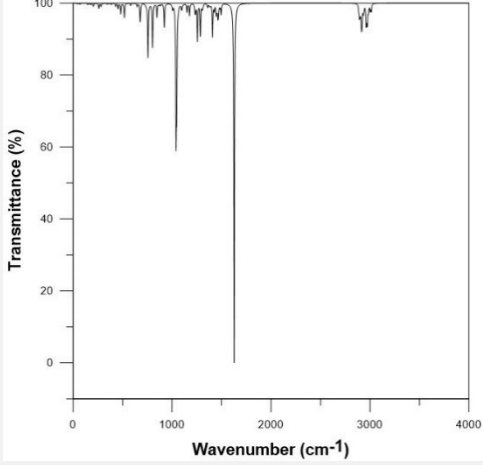   |
| <b>1332</b>    |   |
| <b>1333</b>    |  |

| Structure Name | IR Spectra                                                                           |
|----------------|--------------------------------------------------------------------------------------|
| 2111           | 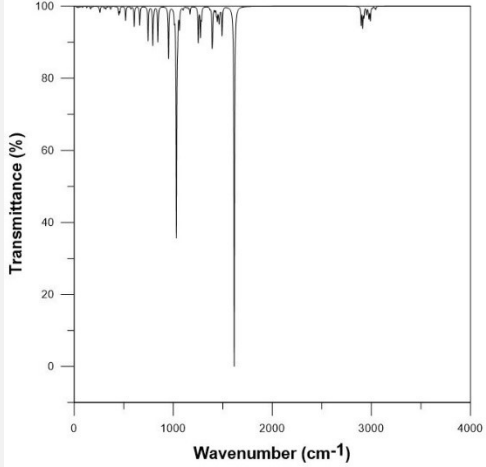   |
| 2112           |   |
| 2113           |  |



| Structure Name | IR Spectra                                                                                                                                                                                                                                                                                                                                                                                                                                                                                                                                                                                                                                                                                                                                                                                                                                                   |
|----------------|--------------------------------------------------------------------------------------------------------------------------------------------------------------------------------------------------------------------------------------------------------------------------------------------------------------------------------------------------------------------------------------------------------------------------------------------------------------------------------------------------------------------------------------------------------------------------------------------------------------------------------------------------------------------------------------------------------------------------------------------------------------------------------------------------------------------------------------------------------------|
| 2121           | 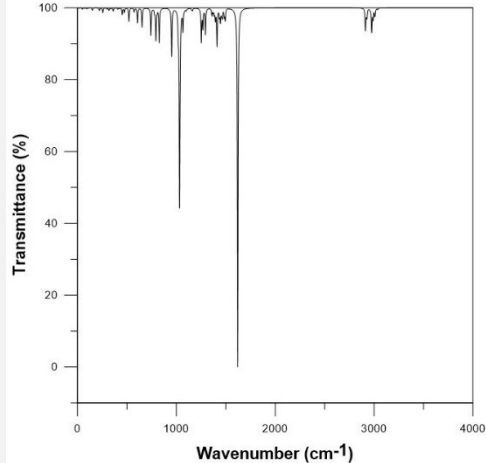 <p>The IR spectrum for structure 2121 shows a transmittance plot from 0 to 4000 cm<sup>-1</sup>. The y-axis is labeled 'Transmittance (%)' and ranges from 0 to 100. The x-axis is labeled 'Wavenumber (cm<sup>-1</sup>)' and ranges from 0 to 4000. Significant absorption bands are observed at approximately 1715 cm<sup>-1</sup> (strong, sharp peak), 1640 cm<sup>-1</sup> (medium peak), 1600 cm<sup>-1</sup> (medium peak), 1510 cm<sup>-1</sup> (medium peak), 1450 cm<sup>-1</sup> (medium peak), 1380 cm<sup>-1</sup> (medium peak), 1270 cm<sup>-1</sup> (medium peak), 1100 cm<sup>-1</sup> (medium peak), and 710 cm<sup>-1</sup> (medium peak). There are also several smaller peaks in the fingerprint region between 1000 and 1500 cm<sup>-1</sup>.</p>   |
| 2122           |  <p>The IR spectrum for structure 2122 shows a transmittance plot from 0 to 4000 cm<sup>-1</sup>. The y-axis is labeled 'Transmittance (%)' and ranges from 0 to 100. The x-axis is labeled 'Wavenumber (cm<sup>-1</sup>)' and ranges from 0 to 4000. Significant absorption bands are observed at approximately 1715 cm<sup>-1</sup> (strong, sharp peak), 1640 cm<sup>-1</sup> (medium peak), 1600 cm<sup>-1</sup> (medium peak), 1510 cm<sup>-1</sup> (medium peak), 1450 cm<sup>-1</sup> (medium peak), 1380 cm<sup>-1</sup> (medium peak), 1270 cm<sup>-1</sup> (medium peak), 1100 cm<sup>-1</sup> (medium peak), and 710 cm<sup>-1</sup> (medium peak). There are also several smaller peaks in the fingerprint region between 1000 and 1500 cm<sup>-1</sup>.</p>  |
| 2123           |  <p>The IR spectrum for structure 2123 shows a transmittance plot from 0 to 4000 cm<sup>-1</sup>. The y-axis is labeled 'Transmittance (%)' and ranges from 0 to 100. The x-axis is labeled 'Wavenumber (cm<sup>-1</sup>)' and ranges from 0 to 4000. Significant absorption bands are observed at approximately 1715 cm<sup>-1</sup> (strong, sharp peak), 1640 cm<sup>-1</sup> (medium peak), 1600 cm<sup>-1</sup> (medium peak), 1510 cm<sup>-1</sup> (medium peak), 1450 cm<sup>-1</sup> (medium peak), 1380 cm<sup>-1</sup> (medium peak), 1270 cm<sup>-1</sup> (medium peak), 1100 cm<sup>-1</sup> (medium peak), and 710 cm<sup>-1</sup> (medium peak). There are also several smaller peaks in the fingerprint region between 1000 and 1500 cm<sup>-1</sup>.</p> |

| Structure Name | IR Spectra                                                                           |
|----------------|--------------------------------------------------------------------------------------|
| 2131           | 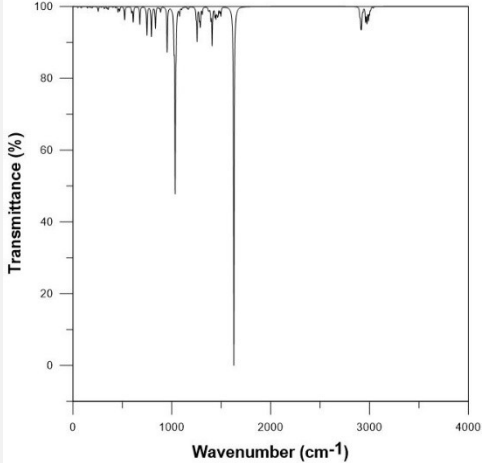   |
| 2132           |   |
| 2133           |  |

| Structure Name | IR Spectra                                                                                                                                                                                                                                                                                                                                                                                                                                                                                                                                                                                           |
|----------------|------------------------------------------------------------------------------------------------------------------------------------------------------------------------------------------------------------------------------------------------------------------------------------------------------------------------------------------------------------------------------------------------------------------------------------------------------------------------------------------------------------------------------------------------------------------------------------------------------|
| 2211           | 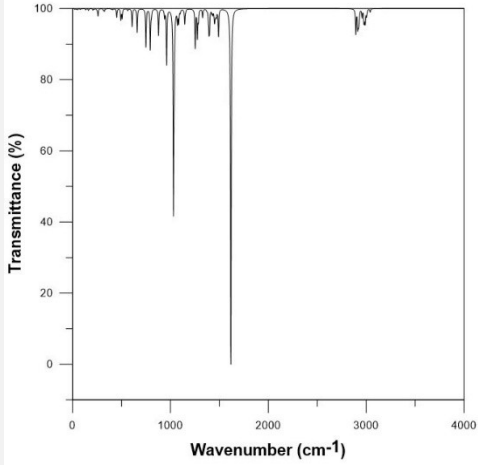 <p>The IR spectrum for structure 2211 shows a transmittance plot from 0 to 4000 cm<sup>-1</sup>. The y-axis is labeled 'Transmittance (%)' and ranges from 0 to 100. The x-axis is labeled 'Wavenumber (cm<sup>-1</sup>)' and ranges from 0 to 4000. The spectrum features a very sharp and deep absorption band at approximately 1715 cm<sup>-1</sup>, characteristic of a carbonyl group. There are also several smaller absorption bands in the fingerprint region between 1500 and 600 cm<sup>-1</sup>.</p>   |
| 2212           |  <p>The IR spectrum for structure 2212 shows a transmittance plot from 0 to 4000 cm<sup>-1</sup>. The y-axis is labeled 'Transmittance (%)' and ranges from 0 to 100. The x-axis is labeled 'Wavenumber (cm<sup>-1</sup>)' and ranges from 0 to 4000. The spectrum features a very sharp and deep absorption band at approximately 1715 cm<sup>-1</sup>, characteristic of a carbonyl group. There are also several smaller absorption bands in the fingerprint region between 1500 and 600 cm<sup>-1</sup>.</p>  |
| 2213           |  <p>The IR spectrum for structure 2213 shows a transmittance plot from 0 to 4000 cm<sup>-1</sup>. The y-axis is labeled 'Transmittance (%)' and ranges from 0 to 100. The x-axis is labeled 'Wavenumber (cm<sup>-1</sup>)' and ranges from 0 to 4000. The spectrum features a very sharp and deep absorption band at approximately 1715 cm<sup>-1</sup>, characteristic of a carbonyl group. There are also several smaller absorption bands in the fingerprint region between 1500 and 600 cm<sup>-1</sup>.</p> |

| Structure Name | IR Spectra                                                                                                                                                                                                                                                                                                                                                                                                                                                                               |
|----------------|------------------------------------------------------------------------------------------------------------------------------------------------------------------------------------------------------------------------------------------------------------------------------------------------------------------------------------------------------------------------------------------------------------------------------------------------------------------------------------------|
| 2221           | 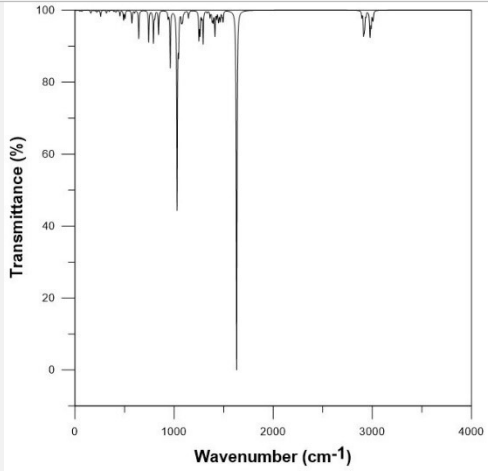 <p>The IR spectrum for structure 2221 shows a transmittance plot from 0 to 4000 cm<sup>-1</sup>. The y-axis is labeled 'Transmittance (%)' and ranges from 0 to 100. The x-axis is labeled 'Wavenumber (cm<sup>-1</sup>)' and ranges from 0 to 4000. Key features include a sharp peak at approximately 1700 cm<sup>-1</sup> and a broad absorption band between 3000 and 3500 cm<sup>-1</sup>.</p>   |
| 2222           |  <p>The IR spectrum for structure 2222 shows a transmittance plot from 0 to 4000 cm<sup>-1</sup>. The y-axis is labeled 'Transmittance (%)' and ranges from 0 to 100. The x-axis is labeled 'Wavenumber (cm<sup>-1</sup>)' and ranges from 0 to 4000. Key features include a sharp peak at approximately 1700 cm<sup>-1</sup> and a broad absorption band between 3000 and 3500 cm<sup>-1</sup>.</p>  |
| 2223           |  <p>The IR spectrum for structure 2223 shows a transmittance plot from 0 to 4000 cm<sup>-1</sup>. The y-axis is labeled 'Transmittance (%)' and ranges from 0 to 100. The x-axis is labeled 'Wavenumber (cm<sup>-1</sup>)' and ranges from 0 to 4000. Key features include a sharp peak at approximately 1700 cm<sup>-1</sup> and a broad absorption band between 3000 and 3500 cm<sup>-1</sup>.</p> |

| Structure Name | IR Spectra                                                                                                                                                                                                                                                                                                                                                                                                                                                                                                                                                                               |
|----------------|------------------------------------------------------------------------------------------------------------------------------------------------------------------------------------------------------------------------------------------------------------------------------------------------------------------------------------------------------------------------------------------------------------------------------------------------------------------------------------------------------------------------------------------------------------------------------------------|
| 2231           | 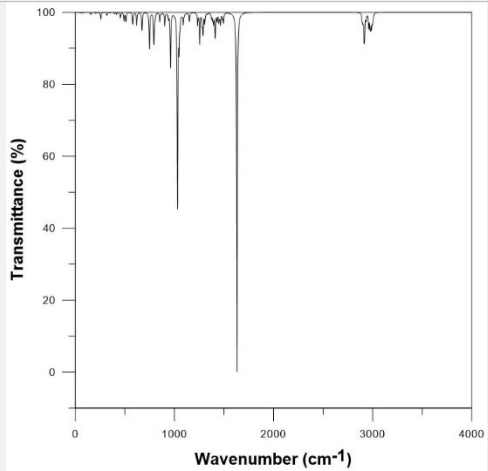 <p>The IR spectrum for structure 2231 shows transmittance (%) on the y-axis (0 to 100) and wavenumber (cm<sup>-1</sup>) on the x-axis (0 to 4000). Key features include a sharp peak at approximately 1715 cm<sup>-1</sup> (C=O stretch), a very strong and sharp peak at approximately 1640 cm<sup>-1</sup> (C=C stretch), and a broad absorption band between 3000 and 3600 cm<sup>-1</sup> (O-H stretch). There are also several peaks in the fingerprint region below 1500 cm<sup>-1</sup>.</p>   |
| 2232           |  <p>The IR spectrum for structure 2232 shows transmittance (%) on the y-axis (0 to 100) and wavenumber (cm<sup>-1</sup>) on the x-axis (0 to 4000). Key features include a sharp peak at approximately 1715 cm<sup>-1</sup> (C=O stretch), a very strong and sharp peak at approximately 1640 cm<sup>-1</sup> (C=C stretch), and a broad absorption band between 3000 and 3600 cm<sup>-1</sup> (O-H stretch). There are also several peaks in the fingerprint region below 1500 cm<sup>-1</sup>.</p>  |
| 2233           |  <p>The IR spectrum for structure 2233 shows transmittance (%) on the y-axis (0 to 100) and wavenumber (cm<sup>-1</sup>) on the x-axis (0 to 4000). Key features include a sharp peak at approximately 1715 cm<sup>-1</sup> (C=O stretch), a very strong and sharp peak at approximately 1640 cm<sup>-1</sup> (C=C stretch), and a broad absorption band between 3000 and 3600 cm<sup>-1</sup> (O-H stretch). There are also several peaks in the fingerprint region below 1500 cm<sup>-1</sup>.</p> |

| Structure Name | IR Spectra                                                                                                                                                                                                                                                                                                                                                                                                                                                                                                                                                         |
|----------------|--------------------------------------------------------------------------------------------------------------------------------------------------------------------------------------------------------------------------------------------------------------------------------------------------------------------------------------------------------------------------------------------------------------------------------------------------------------------------------------------------------------------------------------------------------------------|
| 2311           | 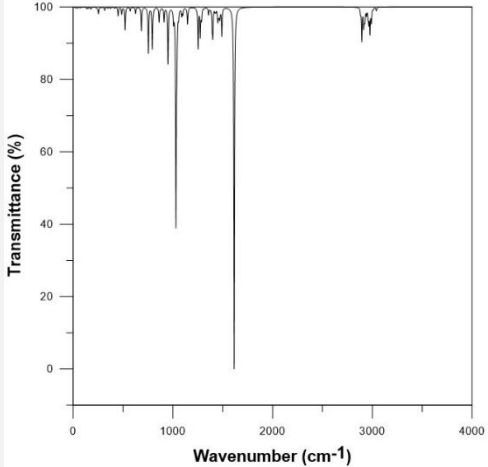 <p>The IR spectrum for structure 2311 shows transmittance (%) on the y-axis (0 to 100) and wavenumber (cm<sup>-1</sup>) on the x-axis (0 to 4000). Key features include a sharp peak at approximately 1715 cm<sup>-1</sup> (C=O stretch), a strong peak at approximately 1275 cm<sup>-1</sup> (C-O stretch), and a peak at approximately 1100 cm<sup>-1</sup> (C-O stretch). There are also several peaks in the fingerprint region between 1500 and 500 cm<sup>-1</sup>.</p>   |
| 2312           |  <p>The IR spectrum for structure 2312 shows transmittance (%) on the y-axis (0 to 100) and wavenumber (cm<sup>-1</sup>) on the x-axis (0 to 4000). Key features include a sharp peak at approximately 1715 cm<sup>-1</sup> (C=O stretch), a strong peak at approximately 1275 cm<sup>-1</sup> (C-O stretch), and a peak at approximately 1100 cm<sup>-1</sup> (C-O stretch). There are also several peaks in the fingerprint region between 1500 and 500 cm<sup>-1</sup>.</p>  |
| 2313           |  <p>The IR spectrum for structure 2313 shows transmittance (%) on the y-axis (0 to 100) and wavenumber (cm<sup>-1</sup>) on the x-axis (0 to 4000). Key features include a sharp peak at approximately 1715 cm<sup>-1</sup> (C=O stretch), a strong peak at approximately 1275 cm<sup>-1</sup> (C-O stretch), and a peak at approximately 1100 cm<sup>-1</sup> (C-O stretch). There are also several peaks in the fingerprint region between 1500 and 500 cm<sup>-1</sup>.</p> |

| Structure Name | IR Spectra                                                                           |
|----------------|--------------------------------------------------------------------------------------|
| 2321           | 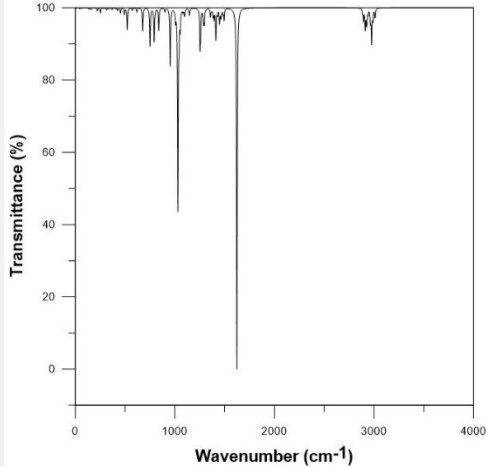   |
| 2322           |   |
| 2323           |  |

| Structure Name | IR Spectra                                                                                                                                                                                                                                                                                                                                                                                                                                                                                                                                                         |
|----------------|--------------------------------------------------------------------------------------------------------------------------------------------------------------------------------------------------------------------------------------------------------------------------------------------------------------------------------------------------------------------------------------------------------------------------------------------------------------------------------------------------------------------------------------------------------------------|
| 2331           | 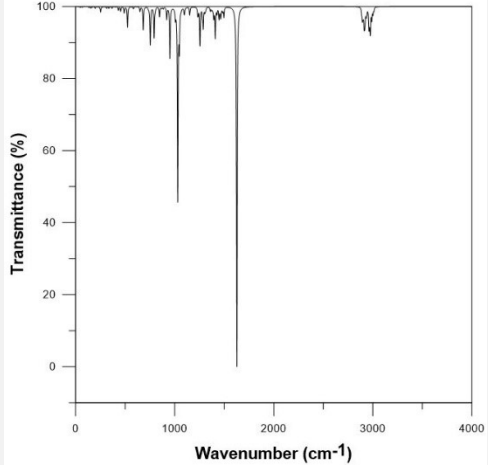 <p>The IR spectrum for structure 2331 shows transmittance (%) on the y-axis (0 to 100) and wavenumber (cm<sup>-1</sup>) on the x-axis (0 to 4000). Key features include a sharp peak at approximately 1715 cm<sup>-1</sup> (C=O stretch), a strong peak at approximately 1275 cm<sup>-1</sup> (C-O stretch), and a peak at approximately 1100 cm<sup>-1</sup> (C-O stretch). There are also several peaks in the fingerprint region between 1500 and 500 cm<sup>-1</sup>.</p>   |
| 2332           |  <p>The IR spectrum for structure 2332 shows transmittance (%) on the y-axis (0 to 100) and wavenumber (cm<sup>-1</sup>) on the x-axis (0 to 4000). Key features include a sharp peak at approximately 1715 cm<sup>-1</sup> (C=O stretch), a strong peak at approximately 1275 cm<sup>-1</sup> (C-O stretch), and a peak at approximately 1100 cm<sup>-1</sup> (C-O stretch). There are also several peaks in the fingerprint region between 1500 and 500 cm<sup>-1</sup>.</p>  |
| 2333           |  <p>The IR spectrum for structure 2333 shows transmittance (%) on the y-axis (0 to 100) and wavenumber (cm<sup>-1</sup>) on the x-axis (0 to 4000). Key features include a sharp peak at approximately 1715 cm<sup>-1</sup> (C=O stretch), a strong peak at approximately 1275 cm<sup>-1</sup> (C-O stretch), and a peak at approximately 1100 cm<sup>-1</sup> (C-O stretch). There are also several peaks in the fingerprint region between 1500 and 500 cm<sup>-1</sup>.</p> |



| Structure Name | IR Spectra                                                                                                                                                                                                                                                                                                                                                                                                                                                                                                                                                     |
|----------------|----------------------------------------------------------------------------------------------------------------------------------------------------------------------------------------------------------------------------------------------------------------------------------------------------------------------------------------------------------------------------------------------------------------------------------------------------------------------------------------------------------------------------------------------------------------|
| 3111           | 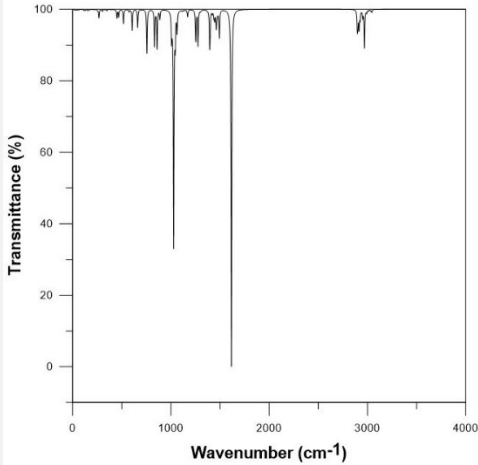 <p>The IR spectrum for structure 3111 shows transmittance (%) on the y-axis (0 to 100) and wavenumber (cm<sup>-1</sup>) on the x-axis (0 to 4000). Key features include a sharp peak at approximately 1715 cm<sup>-1</sup> (C=O stretch), a very strong and sharp peak at approximately 1640 cm<sup>-1</sup> (C=C stretch), and several peaks in the fingerprint region between 1500 and 600 cm<sup>-1</sup>. There are also small peaks around 3000 cm<sup>-1</sup>.</p>   |
| 3112           |  <p>The IR spectrum for structure 3112 shows transmittance (%) on the y-axis (0 to 100) and wavenumber (cm<sup>-1</sup>) on the x-axis (0 to 4000). Key features include a sharp peak at approximately 1715 cm<sup>-1</sup> (C=O stretch), a very strong and sharp peak at approximately 1640 cm<sup>-1</sup> (C=C stretch), and several peaks in the fingerprint region between 1500 and 600 cm<sup>-1</sup>. There are also small peaks around 3000 cm<sup>-1</sup>.</p>  |
| 3113           |  <p>The IR spectrum for structure 3113 shows transmittance (%) on the y-axis (0 to 100) and wavenumber (cm<sup>-1</sup>) on the x-axis (0 to 4000). Key features include a sharp peak at approximately 1715 cm<sup>-1</sup> (C=O stretch), a very strong and sharp peak at approximately 1640 cm<sup>-1</sup> (C=C stretch), and several peaks in the fingerprint region between 1500 and 600 cm<sup>-1</sup>. There are also small peaks around 3000 cm<sup>-1</sup>.</p> |

| Structure Name | IR Spectra                                                                                                                                                                                                                                                                                                                                                                                                                                                                                                                                                                            |
|----------------|---------------------------------------------------------------------------------------------------------------------------------------------------------------------------------------------------------------------------------------------------------------------------------------------------------------------------------------------------------------------------------------------------------------------------------------------------------------------------------------------------------------------------------------------------------------------------------------|
| 3121           | 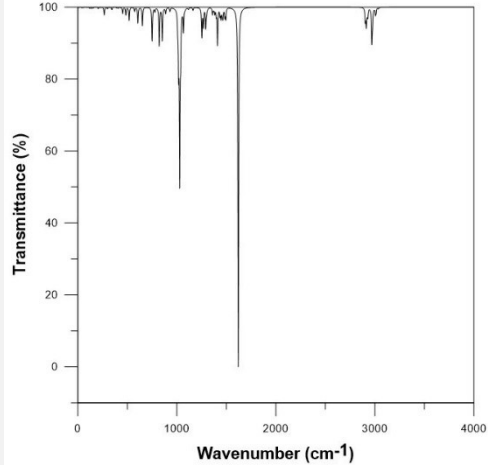 <p>The IR spectrum for structure 3121 shows transmittance (%) on the y-axis (0 to 100) and wavenumber (cm<sup>-1</sup>) on the x-axis (0 to 4000). Key features include a sharp peak at approximately 1715 cm<sup>-1</sup> (C=O stretch), a strong peak at approximately 1640 cm<sup>-1</sup> (C=C stretch), and a very strong, sharp peak at approximately 1600 cm<sup>-1</sup> (C=C stretch). There are also several peaks in the fingerprint region between 1500 and 600 cm<sup>-1</sup>.</p>   |
| 3122           |  <p>The IR spectrum for structure 3122 shows transmittance (%) on the y-axis (0 to 100) and wavenumber (cm<sup>-1</sup>) on the x-axis (0 to 4000). Key features include a sharp peak at approximately 1715 cm<sup>-1</sup> (C=O stretch), a strong peak at approximately 1640 cm<sup>-1</sup> (C=C stretch), and a very strong, sharp peak at approximately 1600 cm<sup>-1</sup> (C=C stretch). There are also several peaks in the fingerprint region between 1500 and 600 cm<sup>-1</sup>.</p>  |
| 3123           |  <p>The IR spectrum for structure 3123 shows transmittance (%) on the y-axis (0 to 100) and wavenumber (cm<sup>-1</sup>) on the x-axis (0 to 4000). Key features include a sharp peak at approximately 1715 cm<sup>-1</sup> (C=O stretch), a strong peak at approximately 1640 cm<sup>-1</sup> (C=C stretch), and a very strong, sharp peak at approximately 1600 cm<sup>-1</sup> (C=C stretch). There are also several peaks in the fingerprint region between 1500 and 600 cm<sup>-1</sup>.</p> |

| Structure Name | IR Spectra                                                                           |
|----------------|--------------------------------------------------------------------------------------|
| 3131           | 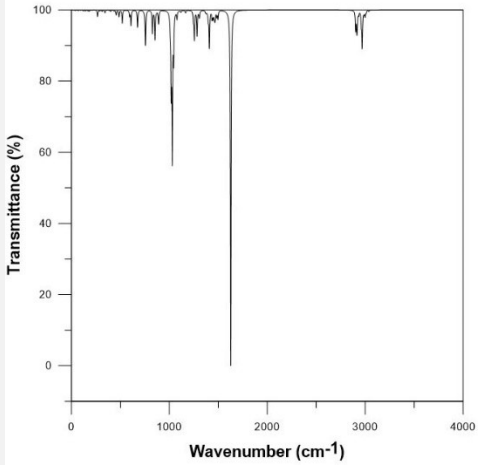   |
| 3132           |   |
| 3133           |  |

| Structure Name | IR Spectra                                                                                                                                                                                                                                                                                                                                                                                                                              |
|----------------|-----------------------------------------------------------------------------------------------------------------------------------------------------------------------------------------------------------------------------------------------------------------------------------------------------------------------------------------------------------------------------------------------------------------------------------------|
| 3211           | 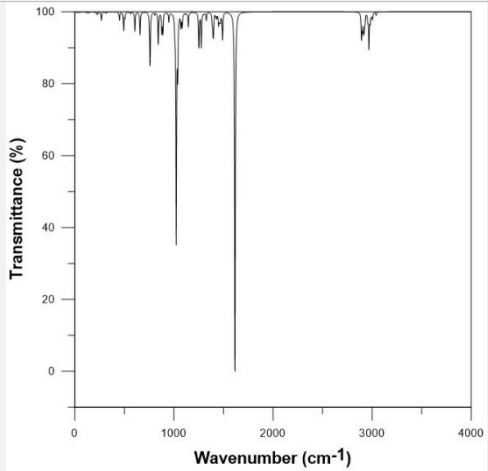 <p>The IR spectrum for structure 3211 shows transmittance (%) on the y-axis (0 to 100) and wavenumber (cm<sup>-1</sup>) on the x-axis (0 to 4000). Key features include a sharp peak at approximately 1715 cm<sup>-1</sup>, a strong peak at approximately 1275 cm<sup>-1</sup>, and a cluster of peaks between 2800 and 3000 cm<sup>-1</sup>.</p>   |
| 3212           |  <p>The IR spectrum for structure 3212 shows transmittance (%) on the y-axis (0 to 100) and wavenumber (cm<sup>-1</sup>) on the x-axis (0 to 4000). Key features include a sharp peak at approximately 1715 cm<sup>-1</sup>, a strong peak at approximately 1275 cm<sup>-1</sup>, and a cluster of peaks between 2800 and 3000 cm<sup>-1</sup>.</p>  |
| 3213           |  <p>The IR spectrum for structure 3213 shows transmittance (%) on the y-axis (0 to 100) and wavenumber (cm<sup>-1</sup>) on the x-axis (0 to 4000). Key features include a sharp peak at approximately 1715 cm<sup>-1</sup>, a strong peak at approximately 1275 cm<sup>-1</sup>, and a cluster of peaks between 2800 and 3000 cm<sup>-1</sup>.</p> |

| Structure Name | IR Spectra                                                                           |
|----------------|--------------------------------------------------------------------------------------|
| 3221           | 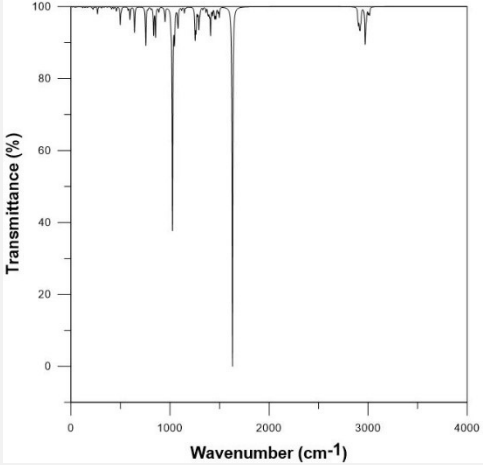   |
| 3222           |   |
| 3223           |  |

| Structure Name | IR Spectra                                                                           |
|----------------|--------------------------------------------------------------------------------------|
| 3231           | 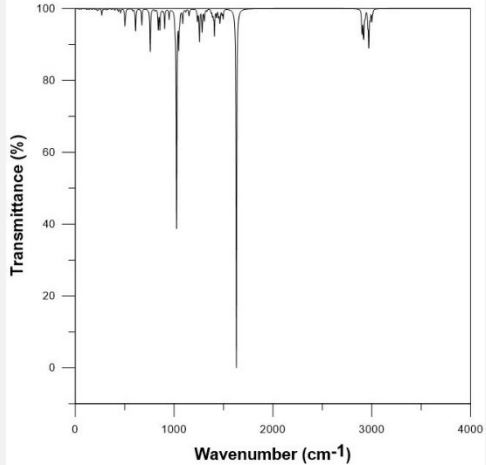   |
| 3232           |   |
| 3233           |  |

| Structure Name | IR Spectra                                                                           |
|----------------|--------------------------------------------------------------------------------------|
| 3311           | 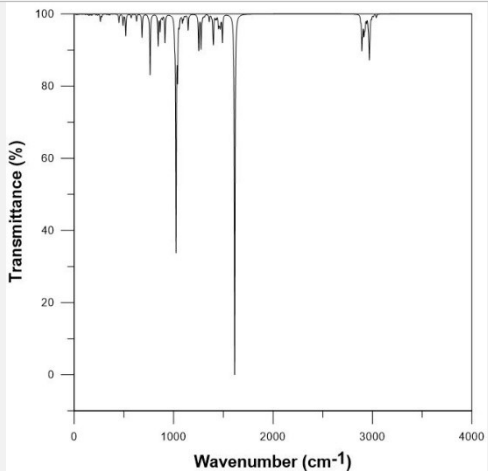   |
| 3312           |   |
| 3313           |  |

| Structure Name | IR Spectra                                                                           |
|----------------|--------------------------------------------------------------------------------------|
| 3321           | 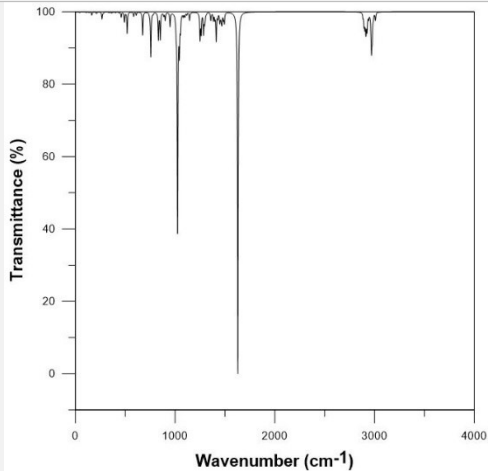   |
| 3322           |   |
| 3323           |  |



| Structure Name | IR Spectra                                                                                                                                                                                                                                                                                                                                                                                                                                                                                                                                                                            |
|----------------|---------------------------------------------------------------------------------------------------------------------------------------------------------------------------------------------------------------------------------------------------------------------------------------------------------------------------------------------------------------------------------------------------------------------------------------------------------------------------------------------------------------------------------------------------------------------------------------|
| 3331           | 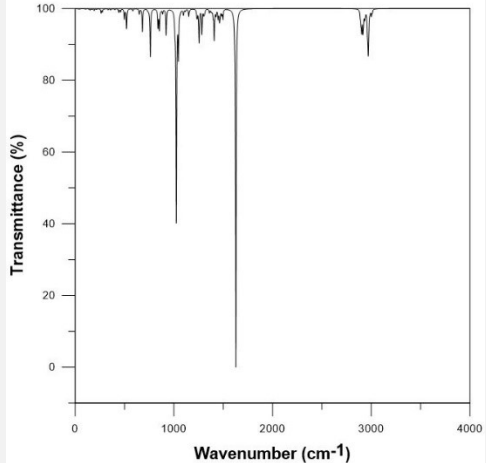 <p>The IR spectrum for structure 3331 shows transmittance (%) on the y-axis (0 to 100) and wavenumber (cm<sup>-1</sup>) on the x-axis (0 to 4000). Key features include a sharp peak at approximately 1715 cm<sup>-1</sup> (C=O stretch), a strong peak at approximately 1640 cm<sup>-1</sup> (C=C stretch), and a very strong, sharp peak at approximately 1600 cm<sup>-1</sup> (C=C stretch). There are also several peaks in the fingerprint region between 1500 and 600 cm<sup>-1</sup>.</p>   |
| 3332           |  <p>The IR spectrum for structure 3332 shows transmittance (%) on the y-axis (0 to 100) and wavenumber (cm<sup>-1</sup>) on the x-axis (0 to 4000). Key features include a sharp peak at approximately 1715 cm<sup>-1</sup> (C=O stretch), a strong peak at approximately 1640 cm<sup>-1</sup> (C=C stretch), and a very strong, sharp peak at approximately 1600 cm<sup>-1</sup> (C=C stretch). There are also several peaks in the fingerprint region between 1500 and 600 cm<sup>-1</sup>.</p>  |
| 3333           |  <p>The IR spectrum for structure 3333 shows transmittance (%) on the y-axis (0 to 100) and wavenumber (cm<sup>-1</sup>) on the x-axis (0 to 4000). Key features include a sharp peak at approximately 1715 cm<sup>-1</sup> (C=O stretch), a strong peak at approximately 1640 cm<sup>-1</sup> (C=C stretch), and a very strong, sharp peak at approximately 1600 cm<sup>-1</sup> (C=C stretch). There are also several peaks in the fingerprint region between 1500 and 600 cm<sup>-1</sup>.</p> |
